# Supplementary material for: Gross changes in forest area shape the future carbon balance of tropical forests
Source: Copernicus journal article supplement (doi:10.5194/bg-2017-291), 2017-08-23
Supplement: Supplementary file 1 [file bg-2017-291-supplement.pdf]

# Supplementary material for “Gross changes in forest area shape the future carbon balance of tropical forests”

Wei Li<sup>1</sup>, Philippe Ciais<sup>1</sup>, Chao Yue<sup>1</sup>, Thomas Gasser<sup>2</sup>, Shushi Peng<sup>3</sup>, Ana Bastos<sup>1</sup>

5 <sup>1</sup>Laboratoire des Sciences du Climat et de l’Environnement, LSCE/IPSL, CEA-CNRS-UVSQ, Université Paris-Saclay,  
91191 Gif-sur-Yvette, France

<sup>2</sup>International Institute for Applied Systems Analysis (IIASA), A-2361 Laxenburg, Austria

<sup>3</sup>Sino-French Institute for Earth System Science, College of Urban and Environmental Sciences, Peking University,  
Beijing 100871, China

*Correspondence to:* Wei Li (wei.li@lsce.ipsl.fr)

**Figure S1** Temporal change of cumulative carbon flux in different assumed scenarios using different response curve combinations. Dotted line indicates the zero line. Response curve combinations from C3 to C8 demonstrate similar conclusions as C1 and C2 but with slight differences in the magnitude.

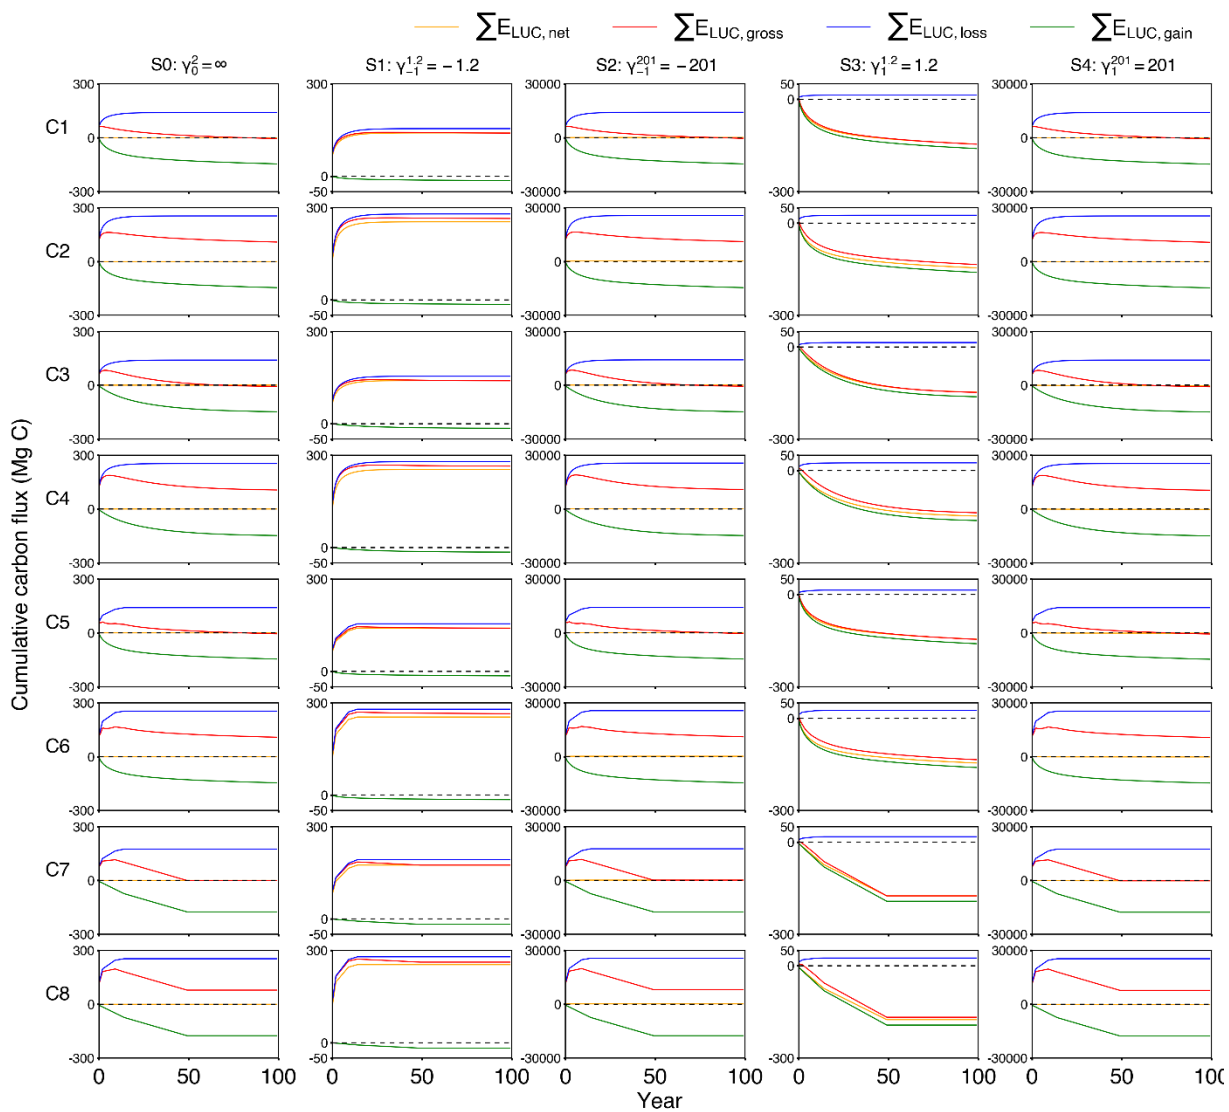

**Figure S2** Temporal change of annual carbon flux in different assumed scenarios using the response curve combination C1 (secondary forest loss and logarithmic biomass recovery curve, solid lines) and C2 (primary forest loss and logarithmic biomass recovery curve, dashed lines). The dotted line is the zero line.

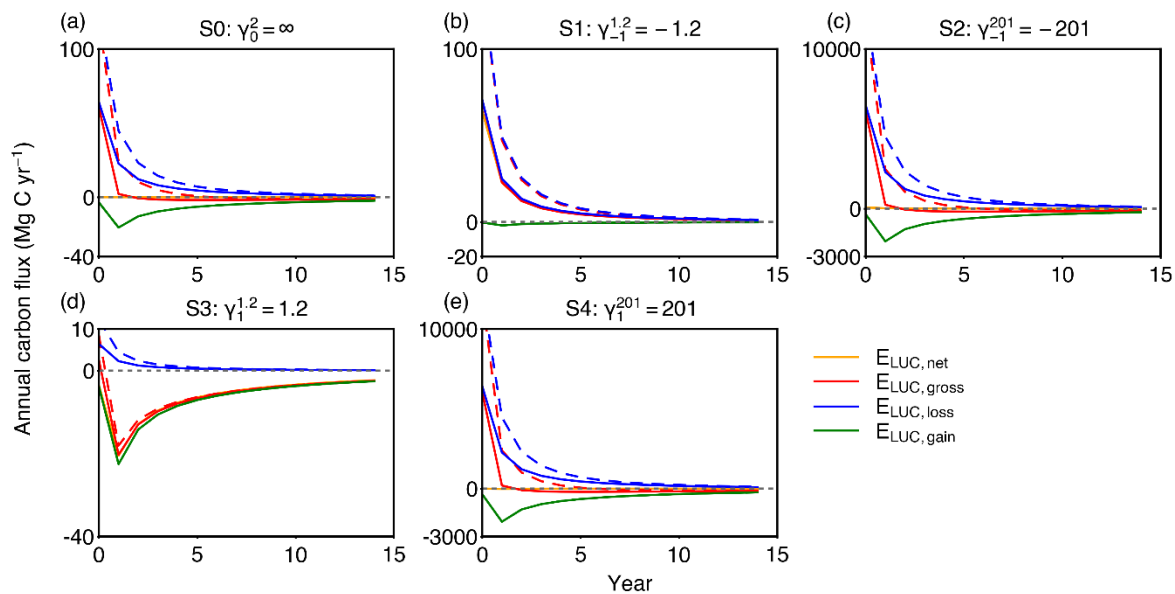

5
